# Supplementary material
Source: PubMed Central journal article supplement (PMC7396280)
Supplement: NIHMS1591710-supplement-1.pdf [file NIHMS1591710-supplement-1.pdf]

Supplemental Table: Distribution of persons, person-years, chronic kidney disease (CKD) diagnosis (dx), and events by categories of baseline glomerular filtration rate (GFR) and urine protein-creatinine ratio (UPCR), N=1,169. Each cell in the table describes the number of participants, overall and distributed by cohort affiliation; prevalence of glomerular CKD; number of events; number of person-years (p-y); and empirical incidence rate (IR; per 100 person-years) of the composite outcome event (50% GFR decline, renal replacement therapy, or GFR<15 mL/min/1.73 m<sup>2</sup>) with 95% confidence interval. Cell coloring defines the final 6 GFR/proteinuria risk stages ordered from best to worst prognosis as follows: A (dark green), B (light green), C (gold), D (tan), E (salmon), and F (red). IRs expressed as events per 100 person-years. Cells with fewer than 15 participants do not have an IR calculated. Abbreviations: CKiD, Chronic Kidney Disease in Children; ESCAPE, European Effect of Strict Blood Pressure Control and ACE Inhibition on the Progression of CRF in Pediatric Patients. [11]

|                    |      |          | Baseline UPCR                                                                                                                             |                                                                                                                                            |                                                                                                                                            |
|--------------------|------|----------|-------------------------------------------------------------------------------------------------------------------------------------------|--------------------------------------------------------------------------------------------------------------------------------------------|--------------------------------------------------------------------------------------------------------------------------------------------|
|                    |      |          | <0.5                                                                                                                                      | [0.5, 2.0]                                                                                                                                 | >2.0                                                                                                                                       |
| Baseline GFR Stage | I    | ≥90      | n=44<br>CKID: 100%<br>ESCAPE: 0%<br>glomerular dx: 48%<br><br>events=3<br>p-y=132.79<br><i>IR=2.3 (0.73, 7.00)</i><br><i>per 100 p-y</i>  | n=12<br>CKID: 100%<br>ESCAPE: 0%<br>glomerular dx: 67%<br><br>events=1<br>p-y=45.82                                                        | n=4<br>CKID: 100%<br>ESCAPE: 0%<br>glomerular dx: 100%<br><br>events=1<br>p-y=11.40                                                        |
|                    | II   | [60, 90) | n=200<br>CKID: 95%<br>ESCAPE: 5%<br>glomerular dx: 29%<br><br>events=12<br>p-y=814.40<br><i>IR=1.5 (0.84, 2.6)</i><br><i>per 100 p-y</i>  | n=48<br>CKID: 94%<br>ESCAPE: 6%<br>glomerular dx: 58%<br><br>events=14<br>p-y=171.93<br><i>IR=8.1 (4.8, 13.8)</i><br><i>per 100 p-y</i>    | n=17<br>CKID: 100%<br>ESCAPE: 0%<br>glomerular dx: 88%<br><br>events=6<br>p-y=42.26<br><i>IR=14.2 (6.4, 31.6)</i><br><i>per 100 p-y</i>    |
|                    | IIIa | [45, 60) | n=190<br>CKID: 73%<br>ESCAPE: 7%<br>glomerular dx: 18%<br><br>events=34<br>p-y=956.79<br><i>IR=3.6 (2.5, 5.0)</i><br><i>per 100 p-y</i>   | n=100<br>CKID: 78%<br>ESCAPE: 22%<br>glomerular dx: 25%<br><br>events=30<br>p-y=469.27<br><i>IR=6.4 (4.5, 9.1)</i><br><i>per 100 p-y</i>   | n=23<br>CKID: 91%<br>ESCAPE: 9%<br>glomerular dx: 57%<br><br>events=15<br>p-y=65.91<br><i>IR=22.8 (13.7, 37.8)</i><br><i>per 100 p-y</i>   |
|                    | IIIb | [30, 45) | n=153<br>CKID: 54%<br>ESCAPE: 46%<br>glomerular dx: 8%<br><br>events=47<br>p-y=797.97<br><i>IR=5.9 (4.4, 7.8)</i><br><i>per 100 p-y</i>   | n=101<br>CKID: 75%<br>ESCAPE: 25%<br>glomerular dx: 21%<br><br>events=51<br>p-y=476.89<br><i>IR=10.7 (8.1, 14.1)</i><br><i>per 100 p-y</i> | n=52<br>CKID: 69%<br>ESCAPE: 31%<br>glomerular dx: 46%<br><br>events=40<br>p-y=125.12<br><i>IR=32.0 (23.5, 43.6)</i><br><i>per 100 p-y</i> |
|                    | IV   | [15-30)  | n=69<br>CKID: 48%<br>ESCAPE: 52%<br>glomerular dx: 7%<br><br>events=41<br>p-y=236.31<br><i>IR=17.4 (12.8, 23.6)</i><br><i>per 100 p-y</i> | n=97<br>CKID: 46%<br>ESCAPE: 54%<br>glomerular dx: 8%<br><br>events=65<br>p-y=262.01<br><i>IR=24.8 (19.5, 31.6)</i><br><i>per 100 p-y</i>  | n=59<br>CKID: 59%<br>ESCAPE: 41%<br>glomerular dx: 36%<br><br>events=52<br>p-y=89.05<br><i>IR=58.4 (44.5, 76.6)</i><br><i>per 100 p-y</i>  |
